# Supplementary material for: Clusterin Attenuates Hepatic Fibrosis by Inhibiting Hepatic Stellate Cell Activation and Downregulating the Smad3 Signaling Pathway
Source: MDPI journal article supplement (doi:10.3390/cells8111442), 2019-11-14

### Supplementary chemicals

The anti-PAI-1 antibody (612025) and anti-fibronectin (610077) were purchased from BD bio sciences (San Jose, CA, USA)

### Supplementary Figure S1. Loss of clusterin increases the expression of PAI-1 after TAA injection.

Representative western blot analysis of PAI-1 expression in the livers of wild-type (Clu+/+) and clusterin KO (Clu-/-) mice after TAA injection. Data in the graph are represented as the mean  $\pm$  SEM.

\*P < 0.05 compared with Clu+/+.

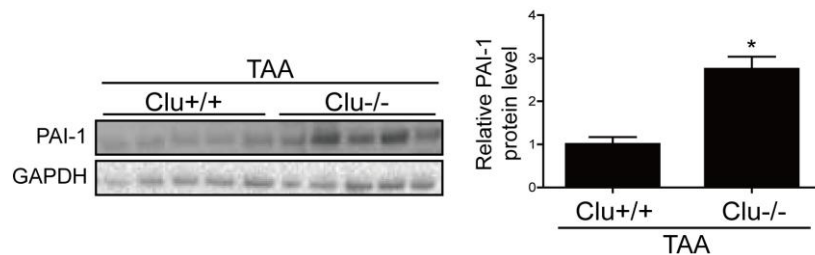

### Supplementary Figure S2. Clusterin inhibits collagen in primary HSC.

Western blot analysis of collagen expression in cultured HSCs at 7 days. Primary HSCs were infected with Ad-Clu and harvested 24 h later.

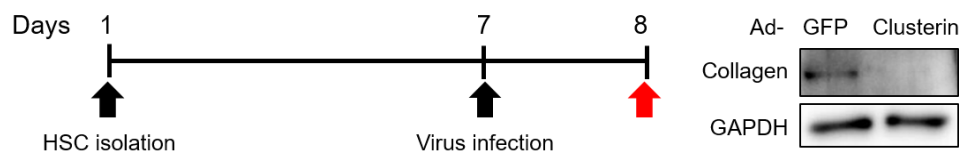

### Supplementary Figure S3. Clusterin inhibits fibronectin expression in LX2 cells.

Western blot analysis showing the effect of clusterin on TGF- $\beta$ -induced fibronectin expression in LX2 cells. Data in the graph are represented as the mean  $\pm$  SEM of three independent measurements. \*P <

0.05 compared with the control, #P < 0.05 compared with TGF- $\beta$ .

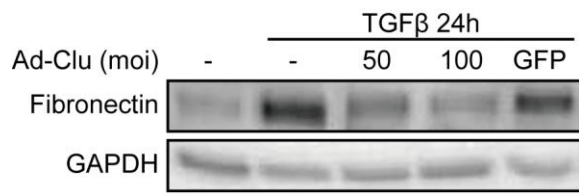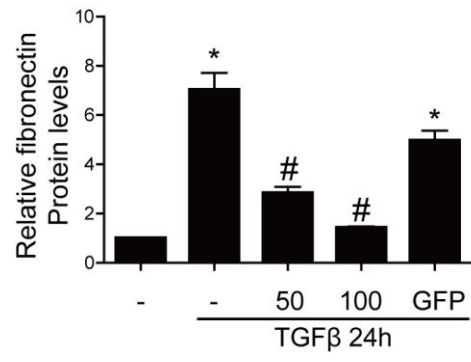

Supplement: s1 [file s1]
